# Supplementary material
Source: publisher figshare collection journal article supplement (https://tandf.figshare.com/ndownloader/files/20103959)
Supplement: Supplementary file 1 [file 20103959]

Supplemental Table 1

*Subreddit Demographics*

| Characteristics (*n* = 1,728) | Count (%) |
| --- | --- |
| Relationship Status (*n* = 1,145) |  |
| Long-Term Relationship | 362 (31.6%) |
| Single and Not Looking | 277 (24.2%) |
| Married | 259 (22.6%) |
| Casually Dating | 154 (13.5%) |
| Engaged | 54 (4.7%) |
| Other | 39 (3.5%) |
|  |  |
| Racial Background |  |
| Caucasian | 1,375 (79.6%) |
| Hispanic/LatinX | 78 (4.5%) |
| Biracial | 58 (3.4%) |
| East Asian | 56 (3.2%) |
| African Descent/Black | 41 (2.4%) |
| Multiracial | 36 (2.0%) |
| Other | 84 (4.9%) |
|  |  |
| Sexual Orientation |  |
| Heterosexual | 1,170 (67.7%) |
| Bisexual | 309 (17.9%) |
| Pansexual | 84 (4.9%) |
| Asexual | 81 (4.7%) |
| Homosexual | 56 (3.2%) |
| Other | 28 (1.6%) |
|  |  |
| Gender Identification |  |
| Female | 1,216 (70.4%) |
| Male | 452 (26.2%) |
| Non-Binary | 49 (2.8%) |
| Other | 11 (0.6%) |
|  |  |
| Age |  |
| -18-24 | 622 (36.0%) |
| 25-34 | 889 (51.5%) |
| 35-44 | 175 (10.1%) |
| 45+ | 40 (2.3%) |

*Note.* Only 1,145 respondents completed the relationship status question. All other categories use *n* = 1,728.

Supplemental Table 2

*Locations where Childfree Individuals Encounter Bingos* (*n* = 272)

| Location | Count (%) |
| --- | --- |
| Work | 67 (24.6%) |
| Social Event | 36 (13.2%) |
| Online/Phone | 35 (12.8%) |
| Medical Establishment | 33 (12.1%) |
| Friend/Parent’s House | 24 (8.5%) |
| Restaurant | 17 (6.2%) |
| School/University | 15 (5.4%) |
| Home | 13 (4.7%) |
| Store | 12 (4.3%) |
| Other | 20 (7.3%) |

**Note.* 265 individual posts mentioned the location of the conversation. Six posts mentioned two locations, and one post mentioned three locations.

Supplemental Table 3

*Identities of “Bingoers” Represented in Narratives* (*n* = 407)

| Relationship to Childfree Person | Count (%) |
| --- | --- |
| Immediate Family (Parent or Sibling) | 77 (18.9%) |
| Extended Family | 77 (18.9%) |
| Friend/Roommate | 70 (17.2%) |
| Colleague/Classmate | 68 (16.7%) |
| Medical Professional | 32 (7.9%) |
| Stranger | 30 (7.4%) |
| Customer/Client | 20 (4.9%) |
| Employee/Salesperson | 19 (4.7%) |
| Significant Other | 9 (2.2%) |
| Professor | 5 (1.2%) |

*Note.* 381 individual posts mentioned the identity of the other person in the conversation. 23 posts mentioned two people, and three posts mentioned three people.
